# Supplementary material for: Tetranuclear rare-earth complexes: energy barrier enhancement and two-step slow magnetic relaxation activated by ligand substitution
Source: Royal Society of Chemistry journal article supplement (doi:10.1039/c8qi01309h), 2019-01-01
Supplement: c8qi01309h1.pdf [file c8qi01309h1.pdf]

# **Tetranuclear Rare-Earth Complexes: Energy-Barrier Enhancement and Two-step Relaxation Activated by Ligand Substitution**

Jian Gou,<sup>a</sup> Shuang Liu,<sup>c</sup> Yun-Juan Wang,<sup>a</sup> Ling Li,<sup>a</sup> Peng Ren,<sup>b, c</sup> Hong-Ling Gao,<sup>\*a, c</sup> and Jian-Zhong Cui<sup>\*a, c</sup>

*\* Corresponding authors, E-mail: cuijianzhong@tju.edu.cn, ghl@tju.edu.cn.*

*<sup>a</sup> Department of Chemistry, Tianjin University, Tianjin, 300354, China.*

*<sup>b</sup> School of Science, Harbin Institute of Technology (Shenzhen), Shenzhen, 518055, China.*

*<sup>c</sup> Key Laboratory of Advanced Energy Materials Chemistry (Ministry of Education), Nankai University, Tianjin, 300071, China.*

## **Content**

Section S1 Supplementary Experimental Section

Section S2 Powder X-ray Diffraction and Thermogravimetric Analysis

Section S3 Plots of Magnetic Data and Relaxation Fitting Parameters

Section S4 Crystallographic Data, Comparison of Magneto-Structural Correlation and Continuous Shape Measures Values

## Section S1 Supplementary Experimental Section

### Synthesis of 5-(2-furanimino)-8-hydroxyquinoline (HL)

**5-amino-8-hydroxyquinoline.** 5-amino-8-hydroxyquinoline was synthesized with minor modifications compared to the method reported previously in the literature.<sup>1</sup> 5-nitryl-8-hydroxyquinoline (4.75 g, 0.025 mol) and 5% Pd/C (0.0625 g), the latter was used after dried with P<sub>2</sub>O<sub>5</sub> and acted as catalyst, in a 1.3% ratio were added to absolute isopropanol. Then 5 mL of 80% hydrazine hydrate was dropped slowly into the solution at 70 °C over 30 minutes. The mixture was heated to 95 °C and refluxed for 4 h. Finally, the reaction system was filtered while hot, and the filtrate was allowed to stand still at 0 °C for 6 h to crystallize. Subsequently, green needle crystals were obtained. (yield 2.5 g, 62.3%). Elemental analysis (%): calcd for C<sub>9</sub>H<sub>8</sub>ON<sub>2</sub> (fw = 160.42): C, 67.50; H, 5.00; N, 17.50. Found: C, 67.28; H, 4.73; N, 17.82. IR (cm<sup>-1</sup>): 3344 (s), 1688 (s), 1626 (s), 1489 (s), 1346 (s), 915 (s), 746 (m).

**5-(2-furanimino)-8-hydroxyquinoline (HL).** 5-amino-8-hydroxyquinoline (0.80 g, 5 mmol) was dissolved in 30 mL of ethanol at 60 °C, 0.5 mL of freshly distilled 2-furaldehyde was added, and 3–4 drops of formic acid were dropped into the mixture as a catalyst. After that, the mixture was heated for 4 h at 83 °C. The product was isolated from the mixture and purified by recrystallization from a mixed solvent of ethanol and acetone (3/1, v/v). The purified product was obtained as a green solid (yield 1.00 g, 84.0%). Elemental analysis (%): calcd for C<sub>14</sub>H<sub>10</sub>O<sub>2</sub>N<sub>2</sub> (fw = 238.24): C, 70.58; H, 4.20; N, 11.75; found: C, 70.63; H, 3.92; N, 11.52. IR (cm<sup>-1</sup>): 3115 (w), 3048 (w), 1623 (s), 1575 (m), 1504 (vs), 1467 (s), 1415 (vs), 1282 (vs), 1235 (s), 1196 (s), 1080 (w), 1054 (w), 1011 (m), 938 (w), 813 (m), 790 (m), 703 (m), 650 (w), 592 (w), 411 (w). The <sup>1</sup>HNMR ((CD<sub>3</sub>)<sub>2</sub>SO) spectrum of 5-(2-furaldehyde)-amino-8-hydroxyquinoline (HL) is shown in Fig. S1†.

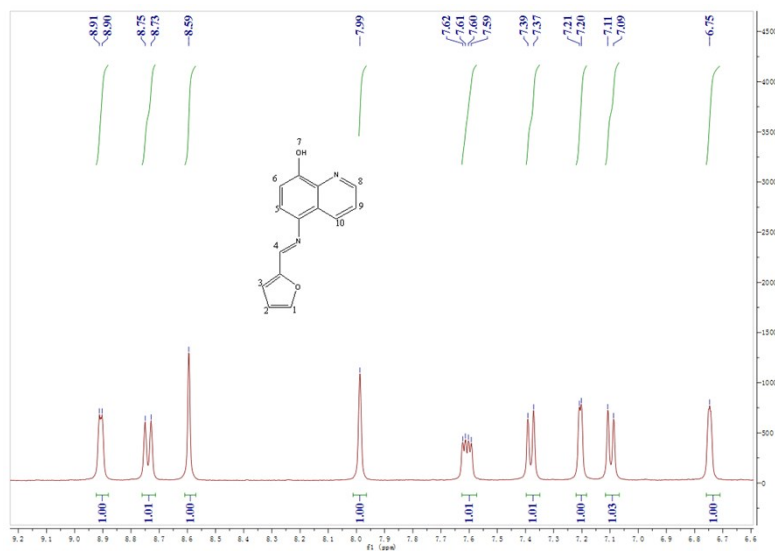

**Fig. S1** The <sup>1</sup>HNMR spectrum of 5-(2-furanimino)-8-hydroxyquinoline (HL).

[1] A. Lilienkampf, J. L. Mao, B. J. Wan, Y. H. Wang, S. G. Franzblau and A. P. Kozikowski, *J. Med. Chem.*, 2009, 52, 2109–2118.

### Section S2 Powder X-ray Diffraction and Thermogravimetric Analysis

To confirm the phase purity of the bulk samples for **1–6**, the experimental powder X-ray diffraction (PXRD) were carried out at room temperature (**Fig. S2†**). The main peaks

displayed in the measured patterns matched well with the simulated patterns generated from single-crystal X-ray diffraction data. Several missing or extra minor peaks could be attributed to the unavoidable loss of the solvent molecules in the unit cell during the sample preparation.

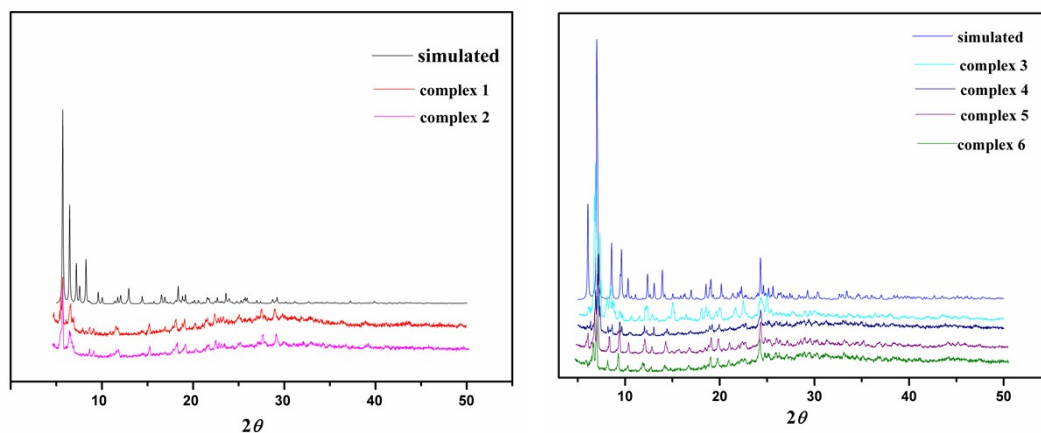

**Fig. S2** The experimental and simulated PXRD patterns of complexes **1–6**.

To study further the thermal stability of the complexes **1–6**, the thermal behaviors were examined in the crystalline samples under an air atmosphere from 30 to 800 °C using thermogravimetric analyses (TGA). There are no solvent losses in the 30–100 °C range because of the spontaneous loss of solvent molecules resulted by the crystal-line samples being kept for an interval of time under ambient conditions (**Fig. S3†**). All of the TG curves are very similar, in which a main weight loss takes place between 300 and 500 °C, which is related to the release of the organic ligands.

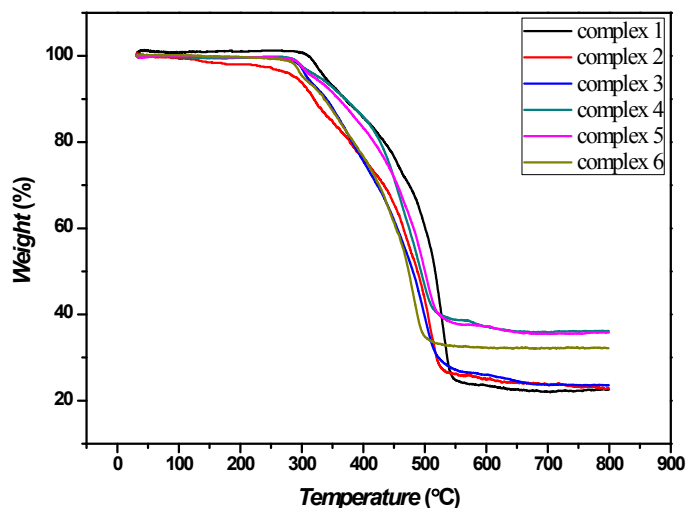

**Fig. S3** TG curves of complexes **1–6**.

### Section S3 Plots of Magnetic Data and Relaxation Fitting Parameters

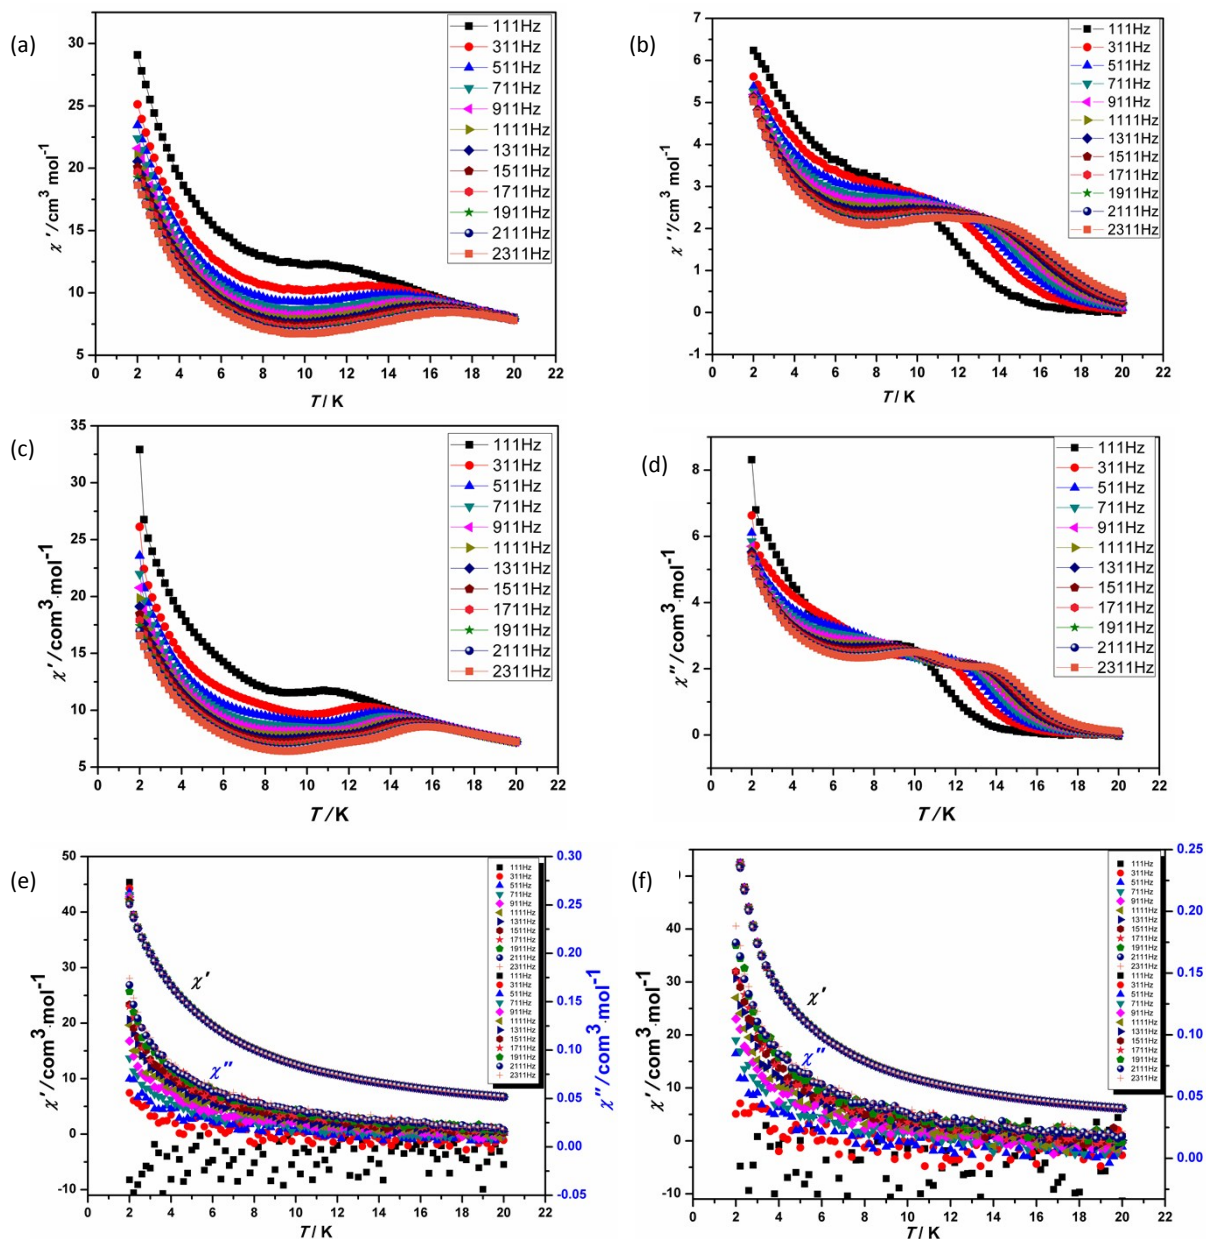

**Fig. S4** Variable-temperature magnetic susceptibility in-phase ( $\chi'$ ) and out-of-phase ( $\chi''$ ) for 2 ((a) and (b)), 4 ((c) and (d)), 5 (e) and 6 (f) with an oscillation of 3.0 Oe under a zero dc field.

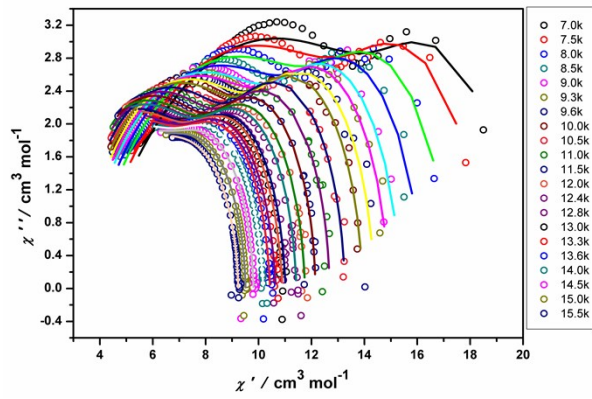

**Fig. S5** The Cole-Cole plot for **4** measured in zero-dc field.

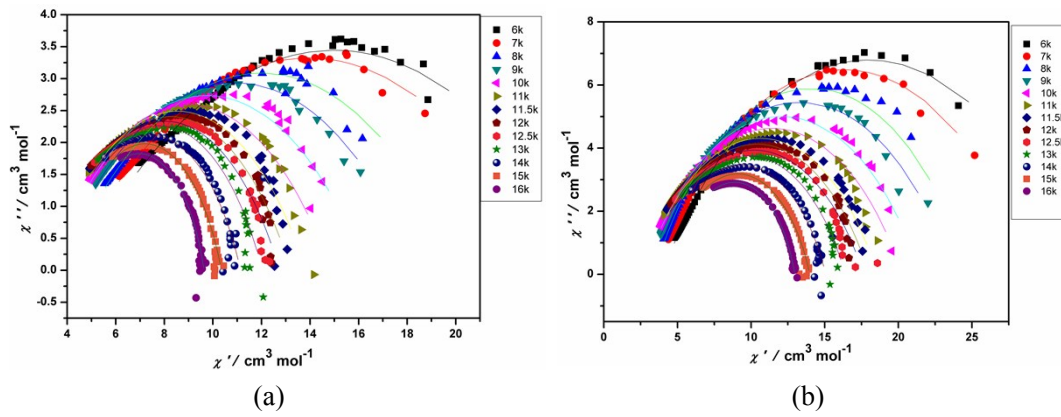

**Fig. S6** Cole-Cole plots for **2** under zero applied dc-field (a) or in 1500 Oe dc field (b).

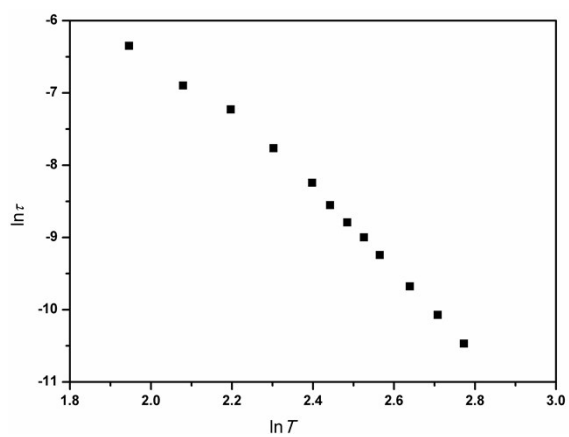

(a)

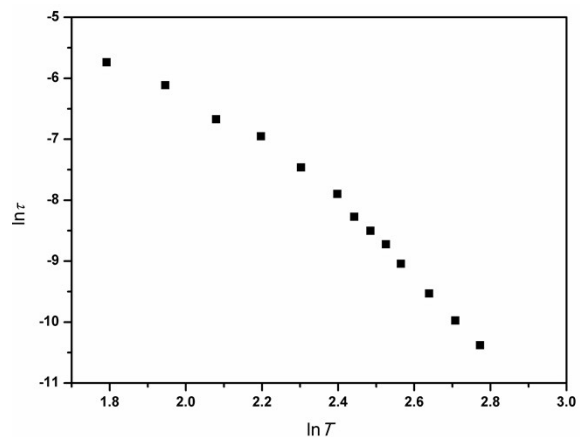

(b)

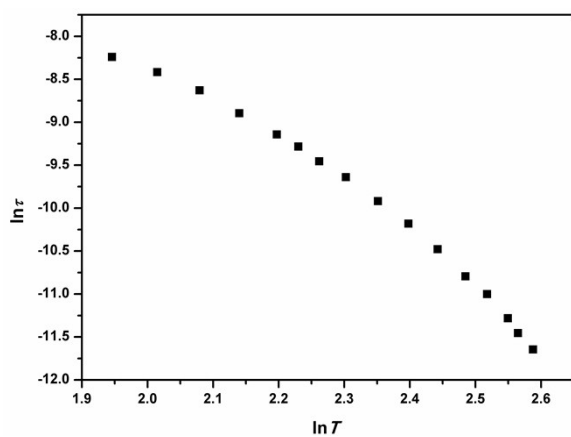

(c)

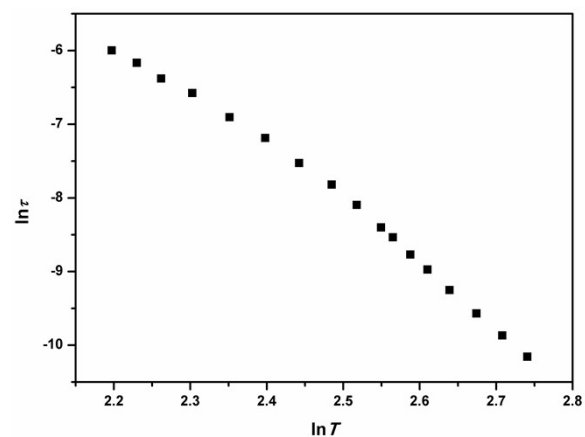

(d)

**Fig. S7** The plots of  $\ln \tau$  vs.  $\ln T$ . (a) For **2** without *dc* field; (b) For **2** in 1500 Oe *dc* field; (c) For **4** (FR); (d) For **4** (SR).

Table S1 Relaxation fitting parameters for Cole-Cole plots of **4** at varying temperatures under zero applied dc-field using the sum of two modified Debye model.

| $T/K$ | $\chi_s$ | $\Delta\chi_1$ | $\alpha_1$ | $\Delta\chi_2$ | $\alpha_2$ |
|-------|----------|----------------|------------|----------------|------------|
| 7     | 3.55364  | 13.0628        | 0.465      | 3.31606        | 0.00294    |
| 7.5   | 3.50558  | 11.6668        | 0.429      | 3.51137        | 1.14E-08   |
| 8     | 3.36928  | 10.4937        | 0.403      | 3.51381        | 2.29E-08   |
| 8.5   | 3.29783  | 9.30755        | 0.366      | 3.63949        | 4.12E-08   |
| 9     | 3.22365  | 8.3991         | 0.329      | 3.77504        | 8.66E-08   |
| 9.3   | 3.14347  | 8.01509        | 0.314      | 3.79459        | 1.24E-07   |
| 9.6   | 3.12069  | 7.46623        | 0.286      | 3.81295        | 3.56E-07   |
| 10    | 3.00491  | 7.12506        | 0.270      | 3.81735        | 8.13E-07   |
| 10.5  | 2.91018  | 6.57574        | 0.239      | 3.78015        | 4.51E-06   |
| 11    | 2.72154  | 6.37559        | 0.233      | 3.59993        | 8.71E-06   |
| 11.5  | 2.58876  | 6.0862         | 0.219      | 3.48299        | 1.82E-05   |
| 12    | 2.17901  | 6.41402        | 0.260      | 3.16708        | 2.81E-05   |
| 12.4  | 2.20656  | 6.15357        | 0.252      | 3.07121        | 3.36E-05   |
| 12.8  | 2.05191  | 6.04111        | 0.256      | 2.92594        | 3.76E-05   |
| 13    | 1.72569  | 6.44699        | 0.297      | 2.74335        | 5.79E-05   |
| 13.3  | 1.6991   | 6.29437        | 0.296      | 2.66401        | 9.99E-05   |
| 13.6  | 2.07486  | 5.72541        | 0.267      | 2.64032        | 1.19E-04   |
| 14    | 2.24674  | 5.47243        | 0.275      | 2.46514        | 1.66E-04   |
| 14.5  | 3.2015   | 4.15002        | 0.176      | 2.45561        | 6.89E-04   |
| 15    | 3.50826  | 3.83005        | 0.162      | 2.16888        | 0.00102    |
| 15.5  | 3.76863  | 3.60137        | 0.146      | 1.86341        | 0.00198    |

Table S2 Relaxation fitting parameters for Cole-Cole plots of **2** at varying temperatures under zero applied dc-field using the Debye model of a single relaxation process.

| $T/K$ | $\chi_T$ | $\chi_s$ | $\alpha$ |
|-------|----------|----------|----------|
| 6     | 25.6056  | 4.36386  | 0.60071  |
| 7     | 23.9087  | 3.9455   | 0.59047  |
| 8     | 20.2123  | 3.79129  | 0.54204  |
| 9     | 18.4534  | 3.42833  | 0.52572  |
| 10    | 16.3018  | 3.21761  | 0.49562  |
| 11    | 14.8382  | 3.14628  | 0.46903  |
| 11.5  | 13.8219  | 3.24616  | 0.43967  |
| 12    | 13.2005  | 3.28293  | 0.42484  |
| 12.5  | 12.743   | 3.33804  | 0.41387  |
| 13    | 12.0364  | 3.56339  | 0.37484  |
| 14    | 11.1393  | 3.76112  | 0.33718  |
| 15    | 10.3441  | 4.05312  | 0.28483  |
| 16    | 9.6365   | 4.29413  | 0.2364   |

Table S3 Relaxation fitting parameters for Cole-Cole plots of **2** at varying temperatures in 1500 Oe *dc* field using the Debye model of a single relaxation process.

| <i>T</i> /K | $\chi_T$ | $\chi_S$ | $\alpha$ |
|-------------|----------|----------|----------|
| 6           | 32.0614  | 3.93975  | 0.4268   |
| 7           | 29.0311  | 3.59774  | 0.39936  |
| 8           | 24.7727  | 3.38247  | 0.35839  |
| 9           | 23.7187  | 2.88099  | 0.38556  |
| 10          | 21.4716  | 2.7176   | 0.37586  |
| 11          | 20.2449  | 2.62089  | 0.38442  |
| 11.5        | 18.5514  | 2.72828  | 0.36494  |
| 12          | 18.0099  | 2.77047  | 0.3679   |
| 12.5        | 17.6395  | 2.74496  | 0.38072  |
| 13          | 16.3909  | 3.13955  | 0.34229  |
| 14          | 15.0721  | 3.6466   | 0.30726  |
| 15          | 13.9783  | 4.19482  | 0.26572  |
| 16          | 12.9674  | 4.81656  | 0.20919  |

Table S4 Standard error for the extracted magnetic parameters

|                     | Value for <b>2</b> in zero <i>dc</i> field | Standard error for <b>2</b> in zero <i>dc</i> field | Value for <b>2</b> in 1500 Oe <i>dc</i> field | Standard error for <b>2</b> in 1500 Oe <i>dc</i> field | Value for <b>4</b> (FR) in zero <i>dc</i> field | Standard error for <b>4</b> (FR) in zero <i>dc</i> field | Value for <b>4</b> (SR) in zero <i>dc</i> field | Standard error for <b>4</b> (SR) in zero <i>dc</i> field |
|---------------------|--------------------------------------------|-----------------------------------------------------|-----------------------------------------------|--------------------------------------------------------|-------------------------------------------------|----------------------------------------------------------|-------------------------------------------------|----------------------------------------------------------|
| $\tau_o$            | 1.79*10 <sup>-8</sup>                      | 1.56*10 <sup>-9</sup>                               | 1.45*10 <sup>-8</sup>                         | 6.89*10 <sup>-10</sup>                                 | 8.54*10 <sup>-11</sup>                          | 4.63*10 <sup>-12</sup>                                   | 1.14*10 <sup>-9</sup>                           | 2.00*10 <sup>-10</sup>                                   |
| $U_{\text{eff}}$    | 117.4                                      | 8.1                                                 | 123.3                                         | 5.5                                                    | 162.1                                           | 13.9                                                     | 165.3                                           | 2.5                                                      |
| <i>C</i>            | 5.30                                       | 1.20                                                | 2.12                                          | 0.26                                                   | 0.931                                           | 0.100                                                    | 0.00667                                         | 8.51*10 <sup>-5</sup>                                    |
| <i>n</i>            | 2.5                                        | 0                                                   | 2.8                                           | 0                                                      | 4.2                                             | 0                                                        | 5                                               | 0                                                        |
| <i>A</i>            | 0                                          | 0                                                   | 0                                             | 0                                                      | 0                                               | 0                                                        | 0                                               | 0                                                        |
| <i>m</i>            | 1                                          | 0                                                   | 1                                             | 0                                                      | 1                                               | 0                                                        | 1                                               | 0                                                        |
| $\tau_{\text{QTM}}$ | 10 <sup>29</sup>                           | --                                                  | 10 <sup>29</sup>                              | --                                                     | 10 <sup>29</sup>                                | --                                                       | 10 <sup>29</sup>                                | --                                                       |

$\tau^{-1} = \tau_0^{-1} e^{-U_{\text{eff}}/k_B T} + CT^n + AT^m + \tau_{\text{QTM}}^{-1}$  (The four process respectively refer to Orbach process, Raman process, direct process and quantum tunneling of the magnetization)



**Section S4 Crystallographic Data, Comparison of Magneto-Structural Correlation and Continuous Shape Measures Values**

**Table S5 Continuous shape measures (CSM) values for 1-6**

| Configuration                                             | CSM values for 1                | CSM values for 2                | CSM values for 3                |
|-----------------------------------------------------------|---------------------------------|---------------------------------|---------------------------------|
| Square antiprism<br>( <i>D</i> 4d)                        | 0.988 for Y1; 1.363 for<br>Y2   | 0.981 for Dy1; 1.571 for<br>Dy2 | 0.761 for Y1; 0.964 for Y2      |
| bicapped trigonal-<br>prismatic ( <i>C</i> 2v)            | 1.836 for Y1; 2.056 for<br>Y2   | 1.785 for Dy1; 2.105 for<br>Dy2 | 1.556 for Y1; 2.129 for Y2      |
| Johnson -<br>Biaugmented trigonal<br>prism ( <i>C</i> 2v) | 2.379 for Y1; 2.890 for<br>Y2   | 2.314 for Dy1; 2.929 for<br>Dy2 | 2.165 for Y1; 2.908 for Y2      |
| Snub disphenoid<br>( <i>D</i> 2d)                         | 4.896 for Y1; 4.525 for<br>Y2   | 4.840 for Dy1; 4.408 for<br>Dy2 | 4.825 for Y1; 4.840 for Y2      |
| Configuration                                             | CSM values for 4                | CSM values for 5                | CSM values for 6                |
| Square antiprism<br>( <i>D</i> 4d)                        | 0.779 for Dy1; 1.011<br>for Dy2 | 0.768 for Ho1; 0.949 for<br>Ho2 | 0.758 for Tb1; 1.207 for<br>Tb2 |
| bicapped trigonal-<br>prismatic ( <i>C</i> 2v)            | 1.536 for Dy1; 2.067<br>for Dy2 | 1.514 for Ho1; 2.089 for<br>Ho2 | 1.605 for Tb1; 2.042 for<br>Tb2 |
| Johnson -<br>Biaugmented trigonal<br>prism ( <i>C</i> 2v) | 2.153 for Dy1; 2.828<br>for Dy2 | 2.158 for Ho1; 2.859 for<br>Ho2 | 2.361 for Tb1; 2.801 for<br>Tb2 |
| Snub disphenoid<br>( <i>D</i> 2d)                         | 4.833 for Dy1; 4.653<br>for Dy2 | 4.771 for Ho1; 4.786 for<br>Ho2 | 5.059 for Tb1; 4.744 for<br>Tb2 |

Table S6 Comparison of some Dy<sup>III</sup><sub>4</sub>-SMMs with similar coordination environment

| complex <sup>a</sup>                                                                                                                                | Configuration/CSM values for Dy1 and Dy2 <sup>b</sup> | $U_{\text{eff}}/K$ under zero dc field | ref       |
|-----------------------------------------------------------------------------------------------------------------------------------------------------|-------------------------------------------------------|----------------------------------------|-----------|
| [Dy <sub>4</sub> (dbm) <sub>4</sub> (L) <sub>6</sub> (μ <sub>3</sub> -OH) <sub>2</sub> ]                                                            | SAPR-8 0.981 and 1.571                                | 117.4                                  | this work |
| [Dy <sub>4</sub> (acac) <sub>4</sub> (L) <sub>6</sub> (μ <sub>3</sub> -OH) <sub>2</sub> ]·(CH <sub>3</sub> CN) <sub>2</sub>                         | SAPR-8 0.779 and 1.011                                | 162.1(FR)<br>165.3(SR)                 | this work |
| [Dy <sub>4</sub> (acac) <sub>4</sub> (L1) <sub>6</sub> (μ <sub>3</sub> -OH) <sub>2</sub> ]                                                          | SAPR-8 0.867 and 1.158                                | 48K(FR)<br>121K(SR)                    | 11a       |
| [Dy <sub>4</sub> (μ <sub>3</sub> -OH) <sub>2</sub> (L2) <sub>6</sub> (acac) <sub>4</sub> ]·2.5CH <sub>3</sub> CN                                    | SAPR-8 0.895 and 0.863                                | 99.29                                  | 11b       |
| [Dy <sub>4</sub> (μ <sub>3</sub> -OH) <sub>2</sub> (L2) <sub>6</sub> (tmhd) <sub>4</sub> ]·xCH <sub>3</sub> CN·yCH <sub>3</sub> CH <sub>2</sub> OH  | SAPR-8 0.778 and 1.341                                | 64.56                                  | 11b       |
| [Dy <sub>4</sub> (μ <sub>3</sub> -OH) <sub>2</sub> (L2) <sub>6</sub> (beac) <sub>4</sub> ]·CH <sub>3</sub> CN                                       | SAPR-8 0.885 and 1.241                                | 61.05                                  | 11b       |
| [Dy <sub>4</sub> (dbm) <sub>4</sub> (L3) <sub>6</sub> (μ <sub>3</sub> -OH) <sub>2</sub> ]·xCH <sub>3</sub> CN·yCH <sub>2</sub> Cl <sub>2</sub>      | SAPR-8 0.914 and 1.469                                | 93.23                                  | 11c       |
| [Dy <sub>4</sub> (acac) <sub>4</sub> (L3) <sub>6</sub> (μ <sub>3</sub> -OH) <sub>2</sub> ]·xCH <sub>3</sub> CN                                      | SAPR-8 1.262 and 0.945                                | 37.49(FR)<br>89.89(SR)                 | 11c       |
| [Dy <sub>4</sub> (dbm) <sub>4</sub> (L4) <sub>6</sub> (μ <sub>3</sub> -OH) <sub>2</sub> ]·4CH <sub>3</sub> CN·2H <sub>2</sub> O                     | SAPR-8 0.945 and 1.462                                | 89.38                                  | 11d       |
| [Dy <sub>4</sub> (acac) <sub>4</sub> (L5) <sub>6</sub> (μ <sub>3</sub> -OH) <sub>2</sub> ]·CH <sub>3</sub> CN·0.5CH <sub>2</sub> Cl <sub>2</sub>    | SAPR-8 0.835 and 1.112                                | 86.2                                   | 11e       |
| [Dy <sub>4</sub> (μ <sub>3</sub> -OH) <sub>2</sub> (μ-OH) <sub>2</sub> (2,2-bpt) <sub>4</sub> (NO <sub>3</sub> ) <sub>4</sub> (EtOH) <sub>2</sub> ] | SAPR-8 1.309 and 1.872                                | 80                                     | 7d        |
| [Dy <sub>4</sub> (μ <sub>3</sub> -OH) <sub>2</sub> (L6) <sub>6</sub> (acac) <sub>4</sub> ]                                                          | SAPR-8 0.817 and 0.965                                | 79.15                                  | 11f       |
| [Dy <sub>4</sub> (μ <sub>3</sub> -OH) <sub>2</sub> (L7) <sub>6</sub> (dppd) <sub>4</sub> ]·2CH <sub>3</sub> CN                                      | SAPR-8 1.010 and 1.347                                | 62.36                                  | 11g       |
| [Dy <sub>4</sub> (dbm) <sub>4</sub> (L1) <sub>6</sub> (μ <sub>3</sub> -OH) <sub>2</sub> ]                                                           | SAPR-8 0.922 and 1.445                                | 56K                                    | 11h       |

<sup>a</sup> HL1 = 5-(4-fluorobenzylidene)-8-hydroxylquinoline;

HL2 = 5-(4-methoxybenzylidene)-8-hydroxylquinoline;

HL3 = 5-[(3-methyl-2-thiopheneformaldehyde)-amino]-8-hydroxylquinoline;

HL4 = 5-(4-pyridinecarboxaldehyde)amino-8-hydroxylquinoline;

HL5 = 5-(benzylidene)amino-8-hydroxyquinoline;

2,2-bptH = 3,5-bis(pyridin-2-yl)-1,2,4-triazol;

HL6 = 5-(4-phenylbenzylidene)-8-hydroxylquinoline;

HL7 = 5-(4-ethoxybenzylidene)-8-hydroxylquinoline

<sup>b</sup> SAPR-8: square antiprism

Table S7 Important bond angle and bond parameters for complex 1

| complex 1        |            |                     |            |                    |            |
|------------------|------------|---------------------|------------|--------------------|------------|
| Bond lengths (Å) |            | Bond angles (°)     |            | Bond angles (°)    |            |
| Y(1)-O(8)        | 2.285(6)   | O(8)-Y(1)-O(7)      | 70.8(2)    | O(1)-Y(1)-N(1)     | 66.6(2)    |
| Y(1)-O(7)        | 2.311(5)   | O(8)-Y(1)-O(11)     | 142.40(18) | O(11)#1-Y(1)-N(1)  | 77.8(2)    |
| Y(1)-O(11)       | 2.320(4)   | O(7)-Y(1)-O(11)     | 81.47(17)  | O(3)-Y(1)-N(1)     | 77.19(19)  |
| Y(1)-O(5)#1      | 2.350(5)   | O(8)-Y(1)-O(5)#1    | 120.33(19) | O(10)-Y(2)-O(11)   | 131.0(2)   |
| Y(1)-O(1)        | 2.358(5)   | O(7)-Y(1)-O(5)#1    | 80.61(19)  | O(10)-Y(2)-O(9)    | 74.0(2)    |
| Y(1)-O(11)#1     | 2.371(5)   | O(11)-Y(1)-O(5)#1   | 77.71(17)  | O(11)-Y(2)-O(9)    | 73.26(17)  |
| Y(1)-O(3)        | 2.412(5)   | O(8)-Y(1)-O(1)      | 84.5(2)    | O(10)-Y(2)-O(5)    | 145.2(2)   |
| Y(1)-N(1)        | 2.512(6)   | O(7)-Y(1)-O(1)      | 88.72(19)  | O(11)-Y(2)-O(5)    | 72.54(16)  |
| Y(1)-Y(2)#1      | 3.5352(13) | O(11)-Y(1)-O(1)     | 69.72(18)  | O(9)-Y(2)-O(5)     | 140.45(19) |
| Y(1)-Y(1)#1      | 3.7971(17) | O(5)#1-Y(1)-O(1)    | 146.89(18) | O(10)-Y(2)-O(3)#1  | 137.9(2)   |
| Y(1)-Y(2)        | 3.8367(11) | O(8)-Y(1)-O(11)#1   | 142.83(18) | O(11)-Y(2)-O(3)#1  | 71.15(17)  |
| Y(2)-O(10)       | 2.281(6)   | O(7)-Y(1)-O(11)#1   | 144.36(18) | O(9)-Y(2)-O(3)#1   | 82.8(2)    |
| Y(2)-O(11)       | 2.312(4)   | O(11)-Y(1)-O(11)#1  | 71.93(18)  | O(5)-Y(2)-O(3)#1   | 67.76(18)  |
| Y(2)-O(9)        | 2.318(5)   | O(5)#1-Y(1)-O(11)#1 | 71.02(17)  | O(10)-Y(2)-O(1)    | 86.0(2)    |
| Y(2)-O(5)        | 2.323(5)   | O(8)-Y(1)-O(3)      | 83.07(19)  | O(1)-Y(2)-N(5)     | 80.20(19)  |
| Y(2)-O(3)#1      | 2.355(6)   | O(7)-Y(1)-O(3)      | 118.56(18) | O(10)-Y(2)-N(3)#1  | 76.7(3)    |
| Y(2)-O(1)        | 2.373(5)   | O(11)-Y(1)-O(3)     | 133.51(18) | O(11)-Y(2)-N(3)#1  | 133.9(2)   |
| Y(2)-N(5)        | 2.514(7)   | O(5)#1-Y(1)-O(3)    | 66.38(17)  | O(9)-Y(2)-N(3)#1   | 84.47(19)  |
| Y(2)-N(3)#1      | 2.565(6)   | O(1)-Y(1)-O(3)      | 143.75(18) | O(5)-Y(2)-N(3)#1   | 105.7(2)   |
| Y(2)-Y(1)#1      | 3.5353(13) | O(11)#1-Y(1)-O(3)   | 69.16(17)  | O(3)#1-Y(2)-N(3)#1 | 66.4(2)    |
|                  |            | O(8)-Y(1)-N(1)      | 72.1(2)    | O(3)#1-Y(2)-O(1)   | 134.75(18) |
|                  |            | O(7)-Y(1)-N(1)      | 136.9(2)   | O(10)-Y(2)-N(5)    | 79.1(2)    |
|                  |            | O(11)-Y(1)-N(1)     | 118.05(18) | O(1)-Y(2)-N(3)#1   | 156.5(2)   |
|                  |            | O(5)#1-Y(1)-N(1)    | 138.3(2)   | N(5)-Y(2)-N(3)#1   | 81.0(2)    |
|                  |            | O(9)-Y(2)-O(1)      | 106.16(19) | O(9)-Y(2)-N(5)     | 151.7(2)   |
|                  |            | O(3)#1-Y(2)-N(5)    | 112.7(2)   | O(11)-Y(2)-O(1)    | 69.60(17)  |
|                  |            | O(1)-Y(1)-O(11)#1   | 103.30(18) | O(11)-Y(2)-N(5)    | 133.18(18) |
|                  |            | O(5)-Y(2)-O(1)      | 79.68(19)  | O(5)-Y(2)-N(5)     | 67.3(2)    |

Table S8 Important bond angle and bond parameters for complex 2

| complex 2        |            |                     |            |                      |            |
|------------------|------------|---------------------|------------|----------------------|------------|
| Bond lengths (Å) |            | Bond angles (°)     |            | Bond angles (°)      |            |
| Dy(1)-O(8)       | 2.303(6)   | O(8)-Dy(1)-O(11)    | 142.28(19) | O(11)#1-Dy(1)-O(5)#1 | 71.03(18)  |
| Dy(1)-O(11)      | 2.341(5)   | O(8)-Dy(1)-O(7)     | 70.5(2)    | O(8)-Dy(1)-O(3)      | 83.64(19)  |
| Dy(1)-O(7)       | 2.343(5)   | O(11)-Dy(1)-O(7)    | 81.99(18)  | O(11)-Dy(1)-O(3)     | 133.01(19) |
| Dy(1)-O(1)       | 2.353(6)   | O(8)-Dy(1)-O(1)     | 83.9(2)    | O(7)-Dy(1)-O(3)      | 117.62(18) |
| Dy(1)-O(11)#1    | 2.369(5)   | O(11)-Dy(1)-O(1)    | 70.3(2)    | O(1)-Dy(1)-O(3)      | 143.87(19) |
| Dy(1)-O(5)#1     | 2.382(5)   | O(7)-Dy(1)-O(1)     | 89.5(2)    | O(11)#1-Dy(1)-O(3)   | 69.35(17)  |
| Dy(1)-O(3)       | 2.437(5)   | O(8)-Dy(1)-O(11)#1  | 143.07(18) | O(5)#1-Dy(1)-O(3)    | 66.47(17)  |
| Dy(1)-N(1)       | 2.511(7)   | O(11)-Dy(1)-O(11)#1 | 71.65(18)  | O(8)-Dy(1)-N(1)      | 72.6(2)    |
| Dy(1)-Dy(2)#1    | 3.5558(10) | O(7)-Dy(1)-O(11)#1  | 144.4(2)   | O(11)-Dy(1)-N(1)     | 118.15(19) |
| Dy(1)-Dy(1)#1    | 3.8189(8)  | O(1)-Dy(1)-O(11)#1  | 103.1(2)   | O(7)-Dy(1)-N(1)      | 137.8(2)   |
| Dy(1)-Dy(2)      | 3.8547(8)  | O(8)-Dy(1)-O(5)#1   | 121.1(2)   | O(1)-Dy(1)-N(1)      | 66.9(2)    |
| Dy(2)-O(10)      | 2.288(6)   | O(11)-Dy(1)-O(5)#1  | 76.87(17)  | O(11)#1-Dy(1)-N(1)   | 77.0(2)    |
| Dy(2)-O(9)       | 2.322(5)   | O(7)-Dy(1)-O(5)#1   | 80.2(2)    | O(5)#1-Dy(1)-N(1)    | 137.9(2)   |
| Dy(2)-O(5)       | 2.327(5)   | O(1)-Dy(1)-O(5)#1   | 146.63(18) | O(3)-Dy(1)-N(1)      | 77.1(2)    |
| Dy(2)-O(11)      | 2.339(5)   | O(10)-Dy(2)-O(9)    | 73.1(2)    | O(3)#1-Dy(2)-O(1)    | 134.76(19) |
| Dy(2)-O(3)#1     | 2.370(6)   | O(10)-Dy(2)-O(5)    | 144.8(2)   | O(10)-Dy(2)-N(5)     | 79.0(2)    |
| Dy(2)-O(1)       | 2.390(6)   | O(9)-Dy(2)-O(5)     | 141.64(19) | O(9)-Dy(2)-N(5)      | 151.3(2)   |
| Dy(2)-N(5)       | 2.542(6)   | O(10)-Dy(2)-O(11)   | 131.8(2)   | O(5)-Dy(2)-N(5)      | 66.9(2)    |
| Dy(2)-N(3)#1     | 2.562(6)   | O(9)-Dy(2)-O(11)    | 73.42(17)  | O(11)-Dy(2)-N(5)     | 132.72(17) |
| Dy(2)-Dy(1)#1    | 3.5558(10) | O(10)-Dy(2)-O(3)#1  | 137.2(2)   | O(1)-Dy(2)-N(5)      | 79.6(2)    |
|                  |            | O(9)-Dy(2)-O(3)#1   | 84.20(19)  | O(10)-Dy(2)-N(3)#1   | 77.3(3)    |
|                  |            | O(5)-Dy(2)-O(3)#1   | 68.44(18)  | O(9)-Dy(2)-N(3)#1    | 85.63(18)  |
|                  |            | O(11)-Dy(2)-O(3)#1  | 71.01(18)  | O(5)-Dy(2)-N(3)#1    | 105.07(19) |
|                  |            | O(10)-Dy(2)-O(1)    | 86.7(2)    | O(11)-Dy(2)-N(3)#1   | 132.7(2)   |
|                  |            | O(9)-Dy(2)-O(1)     | 104.9(2)   | O(3)#1-Dy(2)-N(3)#1  | 65.0(2)    |
|                  |            | O(5)-Dy(2)-O(1)     | 79.1(2)    | O(1)-Dy(2)-N(3)#1    | 157.6(2)   |
|                  |            | O(11)-Dy(2)-O(1)    | 69.7(2)    | N(5)-Dy(2)-N(3)#1    | 81.9(2)    |
|                  |            | O(5)-Dy(2)-O(11)    | 72.53(16)  | O(3)#1-Dy(2)-N(5)    | 113.2(2)   |

Table S9 Important bond angle and bond parameters for complex **3**

| complex 3       |           |                     |           |                    |           |
|-----------------|-----------|---------------------|-----------|--------------------|-----------|
| Bond lengths(Å) |           | Bond angles (°)     |           | Bond angles (°)    |           |
| Y(1)-O(7)       | 2.298(2)  | O(7)-Y(1)-O(11)     | 139.36(8) | O(1)-Y(1)-O(5)     | 146.66(8) |
| Y(1)-O(11)      | 2.313(2)  | O(7)-Y(1)-O(8)      | 73.37(9)  | O(11)#1-Y(1)-O(5)  | 71.82(7)  |
| Y(1)-O(8)       | 2.314(2)  | O(11)-Y(1)-O(8)     | 77.34(8)  | O(7)-Y(1)-O(3)     | 86.74(8)  |
| Y(1)-O(1)       | 2.340(2)  | O(7)-Y(1)-O(1)      | 79.49(8)  | O(11)-Y(1)-O(3)    | 133.36(8) |
| Y(1)-O(11)#1    | 2.352(2)  | O(11)-Y(1)-O(1)     | 70.26(7)  | O(8)-Y(1)-O(3)     | 123.10(8) |
| Y(1)-O(3)       | 2.389(2)  | O(8)-Y(1)-O(1)      | 84.74(8)  | O(1)-Y(1)-O(3)     | 143.82(7) |
| Y(1)-N(1)       | 2.559(3)  | O(7)-Y(1)-O(11)#1   | 144.38(8) | O(11)#1-Y(1)-O(3)  | 70.36(8)  |
| Y(2)-O(10)      | 2.286(2)  | O(11)-Y(1)-O(11)#1  | 70.82(9)  | O(5)-Y(1)-O(3)     | 66.95(7)  |
| Y(2)-O(11)#1    | 2.288(2)  | O(8)-Y(1)-O(11)#1   | 142.05(8) | O(7)-Y(1)-N(1)     | 75.48(8)  |
| Y(2)-O(9)       | 2.305(2)  | O(1)-Y(1)-O(11)#1   | 102.89(8) | O(11)-Y(1)-N(1)    | 114.18(8) |
| Y(2)-O(1)#1     | 2.360(2)  | O(7)-Y(1)-O(5)      | 124.45(8) | O(8)-Y(1)-N(1)     | 140.86(9) |
| Y(2)-O(5)       | 2.360(2)  | O(11)-Y(1)-O(5)     | 77.13(8)  | O(1)-Y(1)-N(1)     | 66.65(8)  |
| Y(2)-O(3)       | 2.384(2)  | O(8)-Y(1)-O(5)      | 81.53(8)  | O(11)#1-Y(1)-N(1)  | 73.21(8)  |
| Y(2)-N(5)       | 2.506(3)  | O(3)-Y(1)-N(1)      | 77.58(8)  | O(5)-Y(1)-N(1)     | 136.55(8) |
| Y(2)-N(3)       | 2.528(3)  | O(11)#1-Y(2)-O(1)#1 | 70.31(7)  | O(1)#1-Y(2)-N(3)   | 155.60(8) |
| Y(2)-Y(1)#1     | 3.7987(5) | O(9)-Y(2)-O(1)#1    | 109.55(8) | O(5)-Y(2)-N(3)     | 105.85(9) |
| O(1)-Y(2)#1     | 2.360(2)  | O(10)-Y(2)-O(5)     | 144.93(8) | O(3)-Y(2)-N(3)     | 66.60(8)  |
| O(11)-Y(2)#1    | 2.288(2)  | O(11)#1-Y(2)-O(5)   | 73.36(8)  | N(5)-Y(2)-N(3)     | 77.56(9)  |
| O(11)-Y(1)#1    | 2.352(2)  | O(9)-Y(2)-O(5)      | 140.30(8) | O(10)-Y(2)-O(11)#1 | 128.80(8) |
| Y(1)-O(5)       | 2.383(2)  | O(10)-Y(2)-O(3)     | 139.89(8) | O(11)#1-Y(2)-O(9)  | 73.98(8)  |
|                 |           | O(11)#1-Y(2)-O(3)   | 71.53(8)  | O(10)-Y(2)-O(1)#1  | 83.76(8)  |
|                 |           | O(9)-Y(2)-O(3)      | 81.28(8)  | O(5)-Y(2)-N(5)     | 66.84(9)  |
|                 |           | O(1)#1-Y(2)-O(3)    | 135.08(8) | O(3)-Y(2)-N(5)     | 109.01(9) |
|                 |           | O(5)-Y(2)-O(3)      | 67.40(8)  | O(10)-Y(2)-N(3)    | 78.50(9)  |
|                 |           | O(10)-Y(2)-N(5)     | 80.73(9)  | O(11)#1-Y(2)-N(3)  | 134.08(8) |
|                 |           | O(11)#1-Y(2)-N(5)   | 135.37(9) | O(1)#1-Y(2)-N(5)   | 83.19(8)  |
|                 |           | O(9)-Y(2)-N(5)      | 150.39(9) | O(10)-Y(2)-O(9)    | 74.52(8)  |
|                 |           | O(1)#1-Y(2)-O(5)    | 79.63(8)  |                    |           |

Table S10 Important bond angle and bond parameters for complex 4

| complex 4        |            |                      |          |                      |          |
|------------------|------------|----------------------|----------|----------------------|----------|
| Bond lengths (Å) |            | Bond angles (°)      |          | Bond angles (°)      |          |
| Dy(1)-O(7)       | 2.324(9)   | O(7)-Dy(1)-O(11)#1   | 139.9(3) | O(11)-Dy(1)-O(3)#1   | 71.8(3)  |
| Dy(1)-O(11)#1    | 2.335(8)   | O(7)-Dy(1)-O(8)      | 73.0(3)  | O(1)-Dy(1)-O(3)#1    | 146.9(3) |
| Dy(1)-O(8)       | 2.339(8)   | O(11)#1-Dy(1)-O(8)   | 77.7(3)  | O(7)-Dy(1)-O(5)#1    | 86.8(3)  |
| Dy(1)-O(11)      | 2.344(8)   | O(7)-Dy(1)-O(11)     | 144.6(3) | O(11)#1-Dy(1)-O(5)#1 | 132.6(3) |
| Dy(1)-O(1)       | 2.351(8)   | O(11)#1-Dy(1)-O(11)  | 70.2(3)  | O(8)-Dy(1)-O(5)#1    | 123.2(3) |
| Dy(1)-O(3)#1     | 2.403(8)   | O(8)-Dy(1)-O(11)     | 142.2(3) | O(11)-Dy(1)-O(5)#1   | 70.4(3)  |
| Dy(1)-O(5)#1     | 2.406(8)   | O(7)-Dy(1)-O(1)      | 79.4(3)  | O(1)-Dy(1)-O(5)#1    | 143.7(3) |
| Dy(1)-N(1)       | 2.563(9)   | O(11)#1-Dy(1)-O(1)   | 71.1(3)  | O(3)#1-Dy(1)-O(5)#1  | 66.9(3)  |
| Dy(1)-Dy(2)#1    | 3.5465(8)  | O(8)-Dy(1)-O(1)      | 84.6(3)  | O(7)-Dy(1)-N(1)      | 75.9(3)  |
| Dy(1)-Dy(2)      | 3.8205(8)  | O(11)-Dy(1)-O(1)     | 102.9(3) | O(11)#1-Dy(1)-N(1)   | 114.1(3) |
| Dy(1)-Dy(1)#1    | 3.8267(11) | O(7)-Dy(1)-O(3)#1    | 124.3(3) | O(8)-Dy(1)-N(1)      | 140.6(3) |
| O(3)-Dy(1)#1     | 2.403(8)   | O(11)#1-Dy(1)-O(3)#1 | 76.6(3)  | O(11)-Dy(1)-N(1)     | 73.1(3)  |
| Dy(2)-O(9)       | 2.294(9)   | O(8)-Dy(1)-O(3)#1    | 81.9(3)  | O(1)-Dy(1)-N(1)      | 66.4(3)  |
| Dy(2)-O(10)      | 2.316(8)   | O(5)#1-Dy(1)-N(1)    | 77.8(3)  | O(3)#1-Dy(1)-N(1)    | 136.5(3) |
| Dy(2)-O(11)#1    | 2.321(8)   | O(10)-Dy(2)-O(11)#1  | 74.0(3)  | O(1)-Dy(2)-N(3)      | 82.9(3)  |
| Dy(2)-O(3)       | 2.362(7)   | O(9)-Dy(2)-O(3)      | 145.4(3) | O(5)-Dy(2)-N(3)      | 109.8(3) |
| Dy(2)-O(1)       | 2.382(8)   | O(10)-Dy(2)-O(3)     | 140.7(3) | O(9)-Dy(2)-N(5)      | 78.5(3)  |
| Dy(2)-O(5)       | 2.402(8)   | O(11)#1-Dy(2)-O(3)   | 73.0(3)  | O(10)-Dy(2)-N(5)     | 82.5(3)  |
| Dy(2)-N(3)       | 2.508(10)  | O(9)-Dy(2)-O(1)      | 83.9(3)  | O(11)#1-Dy(2)-N(5)   | 133.6(3) |
| Dy(2)-N(5)       | 2.520(9)   | O(10)-Dy(2)-O(1)     | 108.5(3) | O(3)-Dy(2)-N(5)      | 105.7(3) |
| Dy(2)-Dy(1)#1    | 3.5466(8)  | O(11)#1-Dy(2)-O(1)   | 70.7(3)  | O(1)-Dy(2)-N(5)      | 155.7(3) |
| O(11)-Dy(2)#1    | 2.320(8)   | O(3)-Dy(2)-O(1)      | 79.8(3)  | O(5)-Dy(2)-N(5)      | 66.5(3)  |
| O(11)-Dy(1)#1    | 2.335(8)   | O(9)-Dy(2)-O(5)      | 139.4(3) | N(3)-Dy(2)-N(5)      | 77.8(3)  |
| O(5)-Dy(1)#1     | 2.406(8)   | O(10)-Dy(2)-O(5)     | 81.9(3)  | O(9)-Dy(2)-O(10)     | 73.6(3)  |
|                  |            | O(11)#1-Dy(2)-O(5)   | 70.9(3)  | O(9)-Dy(2)-N(3)      | 80.7(3)  |
|                  |            | O(9)-Dy(2)-O(11)#1   | 129.2(3) | O(11)#1-Dy(2)-N(3)   | 135.4(3) |
|                  |            | O(3)-Dy(2)-O(5)      | 67.6(3)  | O(3)-Dy(2)-N(3)      | 67.2(3)  |
|                  |            | O(1)-Dy(2)-O(5)      | 135.2(3) | O(10)-Dy(2)-N(3)     | 150.2(3) |

Table S11 Important bond angle and bond parameters for complex 5

| complex 5        |           |                     |            |                    |            |
|------------------|-----------|---------------------|------------|--------------------|------------|
| Bond lengths (Å) |           | Bond angles (°)     |            | Bond angles (°)    |            |
| Ho(1)-O(7)       | 2.313(6)  | O(7)-Ho(1)-O(11)#1  | 139.48(19) | O(7)-Ho(1)-O(5)    | 86.82(18)  |
| Ho(1)-O(11)#1    | 2.316(5)  | O(7)-Ho(1)-O(8)     | 73.3(2)    | O(11)#1-Ho(1)-O(5) | 133.13(18) |
| Ho(1)-O(8)       | 2.321(5)  | O(11)#1-Ho(1)-O(8)  | 77.44(19)  | O(8)-Ho(1)-O(5)    | 123.03(18) |
| Ho(1)-O(3)       | 2.340(5)  | O(7)-Ho(1)-O(3)     | 79.26(18)  | O(3)-Ho(1)-O(5)    | 143.83(17) |
| Ho(1)-O(11)      | 2.345(5)  | O(11)#1-Ho(1)-O(3)  | 70.60(18)  | O(11)-Ho(1)-O(5)   | 70.50(17)  |
| O(11)-Ho(1)#1    | 2.316(5)  | O(8)-Ho(1)-O(3)     | 84.69(18)  | O(1)-Ho(1)-O(5)    | 67.00(18)  |
| Ho(1)-O(1)       | 2.391(5)  | O(7)-Ho(1)-O(11)    | 144.46(18) | O(7)-Ho(1)-N(3)    | 75.2(2)    |
| Ho(1)-O(5)       | 2.392(5)  | O(11)#1-Ho(1)-O(11) | 70.6(2)    | O(11)#1-Ho(1)-N(3) | 114.45(18) |
| Ho(1)-N(3)       | 2.546(6)  | O(8)-Ho(1)-O(11)    | 142.05(18) | O(8)-Ho(1)-N(3)    | 140.7(2)   |
| Ho(1)-Ho(2)      | 3.5298(5) | O(3)-Ho(1)-O(11)    | 102.91(17) | O(3)-Ho(1)-N(3)    | 66.64(19)  |
| Ho(1)-Ho(2)#1    | 3.8034(5) | O(7)-Ho(1)-O(1)     | 124.78(18) | O(11)-Ho(1)-N(3)   | 73.41(18)  |
| Ho(1)-Ho(1)#1    | 3.8038(7) | O(11)#1-Ho(1)-O(1)  | 76.73(17)  | O(1)-Ho(1)-N(3)    | 136.58(19) |
| Ho(2)-O(10)      | 2.283(6)  | O(8)-Ho(1)-O(1)     | 81.68(18)  | O(5)-Ho(1)-N(3)    | 77.60(18)  |
| Ho(2)-O(11)      | 2.301(5)  | O(3)-Ho(1)-O(1)     | 146.61(18) | O(10)-Ho(2)-O(11)  | 128.84(19) |
| Ho(2)-O(9)       | 2.307(5)  | O(11)-Ho(2)-O(9)    | 73.97(18)  | O(10)-Ho(2)-O(5)   | 139.81(19) |
| Ho(2)-O(1)       | 2.359(5)  | O(10)-Ho(2)-O(1)    | 145.18(19) | O(11)-Ho(2)-O(5)   | 71.24(17)  |
| Ho(2)-O(3)#1     | 2.366(5)  | O(11)-Ho(2)-O(1)    | 73.02(17)  | O(9)-Ho(2)-O(5)    | 81.43(19)  |
| Ho(2)-O(5)       | 2.391(5)  | O(9)-Ho(2)-O(1)     | 140.30(18) | O(1)-Ho(2)-O(5)    | 67.53(18)  |
| Ho(2)-N(1)       | 2.496(6)  | O(10)-Ho(2)-O(3)#1  | 83.90(19)  | O(3)#1-Ho(2)-O(5)  | 134.94(18) |
| Ho(2)-N(5)       | 2.519(6)  | O(11)-Ho(2)-O(3)#1  | 70.39(18)  | O(10)-Ho(2)-N(1)   | 80.6(2)    |
| Ho(2)-Ho(1)#1    | 3.8035(5) | O(9)-Ho(2)-O(3)#1   | 109.32(18) | O(10)-Ho(2)-O(9)   | 74.2(2)    |
| O(3)-Ho(2)#1     | 2.366(5)  | O(1)-Ho(2)-O(3)#1   | 79.35(18)  | O(11)-Ho(1)-O(1)   | 71.66(17)  |
|                  |           | O(9)-Ho(2)-N(1)     | 150.1(2)   | O(9)-Ho(2)-N(5)    | 82.0(2)    |
|                  |           | O(1)-Ho(2)-N(1)     | 67.3(2)    | O(1)-Ho(2)-N(5)    | 106.1(2)   |
|                  |           | O(3)#1-Ho(2)-N(1)   | 83.3(2)    | O(3)#1-Ho(2)-N(5)  | 155.65(19) |
|                  |           | O(5)-Ho(2)-N(1)     | 109.3(2)   | O(5)-Ho(2)-N(5)    | 66.70(19)  |
|                  |           | O(10)-Ho(2)-N(5)    | 78.5(2)    | N(1)-Ho(2)-N(5)    | 77.4(2)    |
|                  |           | O(11)-Ho(2)-N(5)    | 133.95(19) | O(11)-Ho(2)-N(1)   | 135.6(2)   |

Table S12 Important bond angle and bond parameters for complex 6

| complex 6        |            |                     |          |                    |          |
|------------------|------------|---------------------|----------|--------------------|----------|
| Bond lengths (Å) |            | Bond angles (°)     |          | Bond angles (°)    |          |
| Tb(1)-O(7)       | 2.324(6)   | O(7)-Tb(1)-O(11)#1  | 139.0(2) | O(11)#1-Tb(1)-O(3) | 77.4(2)  |
| Tb(1)-O(11)#1    | 2.337(6)   | O(7)-Tb(1)-O(8)     | 72.9(2)  | O(8)-Tb(1)-O(3)    | 83.0(2)  |
| Tb(1)-O(8)       | 2.348(7)   | O(11)#1-Tb(1)-O(8)  | 77.4(2)  | O(11)-Tb(1)-O(3)   | 71.0(2)  |
| Tb(1)-O(11)      | 2.385(6)   | O(7)-Tb(1)-O(11)    | 144.4(2) | O(5)-Tb(1)-O(3)    | 147.0(2) |
| Tb(1)-O(5)       | 2.386(6)   | O(11)#1-Tb(1)-O(11) | 71.1(3)  | O(7)-Tb(1)-O(1)    | 87.4(2)  |
| O(11)-Tb(1)#1    | 2.337(6)   | O(8)-Tb(1)-O(11)    | 142.6(2) | O(11)#1-Tb(1)-O(1) | 133.2(2) |
| Tb(1)-O(3)       | 2.413(6)   | O(7)-Tb(1)-O(5)     | 78.9(2)  | O(8)-Tb(1)-O(1)    | 124.4(2) |
| Tb(1)-O(1)       | 2.435(7)   | O(11)#1-Tb(1)-O(5)  | 70.3(2)  | O(11)-Tb(1)-O(1)   | 69.4(2)  |
| Tb(1)-N(5)       | 2.550(8)   | O(8)-Tb(1)-O(5)     | 83.8(2)  | O(5)-Tb(1)-O(1)    | 143.4(2) |
| Tb(1)-Tb(2)      | 3.5939(9)  | O(11)-Tb(1)-O(5)    | 103.5(2) | O(3)-Tb(1)-O(1)    | 66.8(2)  |
| Tb(1)-Tb(1)#1    | 3.8419(11) | O(7)-Tb(1)-O(3)     | 125.0(2) | O(7)-Tb(1)-N(5)    | 76.4(2)  |
| O(5)-Tb(2)#1     | 2.395(6)   | O(11)-Tb(2)-N(3)    | 134.0(3) | O(11)#1-Tb(1)-N(5) | 113.1(2) |
| Tb(1)-Tb(2)#1    | 3.8603(10) | O(9)-Tb(2)-N(3)     | 150.3(3) | O(8)-Tb(1)-N(5)    | 140.6(2) |
| Tb(2)-O(10)      | 2.327(7)   | O(3)-Tb(2)-N(3)     | 66.2(3)  | O(11)-Tb(1)-N(5)   | 72.5(2)  |
| Tb(2)-O(11)      | 2.333(6)   | O(5)#1-Tb(2)-N(3)   | 83.1(2)  | N(3)-Tb(2)-N(1)    | 78.7(3)  |
| Tb(2)-O(9)       | 2.340(7)   | O(1)-Tb(2)-N(3)     | 108.9(2) | O(1)-Tb(1)-N(5)    | 77.5(2)  |
| Tb(2)-O(3)       | 2.384(7)   | O(10)-Tb(2)-N(1)    | 78.4(3)  | O(10)-Tb(2)-O(11)  | 131.0(2) |
| Tb(2)-O(5)#1     | 2.395(6)   | O(11)-Tb(2)-N(1)    | 133.1(2) | O(10)-Tb(2)-O(9)   | 73.6(2)  |
| Tb(2)-O(1)       | 2.411(6)   | O(9)-Tb(2)-N(1)     | 82.8(2)  | O(5)-Tb(1)-N(5)    | 66.4(2)  |
| Tb(2)-N(3)       | 2.532(8)   | O(3)-Tb(2)-N(1)     | 106.1(2) | O(3)-Tb(1)-N(5)    | 135.7(2) |
| Tb(2)-N(1)       | 2.558(8)   | O(5)#1-Tb(2)-N(1)   | 156.7(2) | O(5)#1-Tb(2)-O(1)  | 134.6(2) |
| Tb(2)-Tb(1)#1    | 3.8603(10) | O(1)-Tb(2)-N(1)     | 66.2(2)  | O(10)-Tb(2)-N(3)   | 80.0(3)  |
|                  |            | O(11)-Tb(2)-O(9)    | 75.1(2)  | O(9)-Tb(2)-O(5)#1  | 107.1(2) |
|                  |            | O(10)-Tb(2)-O(3)    | 143.7(2) | O(3)-Tb(2)-O(5)#1  | 79.3(2)  |
|                  |            | O(11)-Tb(2)-O(3)    | 72.4(2)  | O(10)-Tb(2)-O(1)   | 140.1(3) |
|                  |            | O(9)-Tb(2)-O(3)     | 142.3(2) | O(11)-Tb(2)-O(1)   | 70.7(2)  |
|                  |            | O(10)-Tb(2)-O(5)#1  | 84.2(2)  | O(9)-Tb(2)-O(1)    | 84.0(2)  |
|                  |            | O(11)-Tb(2)-O(5)#1  | 70.2(2)  | O(3)-Tb(2)-O(1)    | 67.6(2)  |

Symmetry transformations used to generate equivalent atoms: #1 -x+1,-y+2,-z+1.
